# Supplementary material for: Validity and Reliability of the Cardiac Rehabilitation Barriers Scale in the Czech Republic (CRBS-CZE): Determination of Key Barriers in East-Central Europe
Source: MDPI journal article supplement (doi:10.3390/ijerph182413113), 2021-12-12
Supplement: s1 [file s1]

**Supplementary Table S1.** Characteristics of participants completing 2<sup>nd</sup> CRBS administration.

| Characteristics                                                     | Total<br>(n = 42)   | Completers<br>(n = 30) | Non-completers<br>(n = 12) | t        |
|---------------------------------------------------------------------|---------------------|------------------------|----------------------------|----------|
| <b>Sociodemographic</b>                                             |                     |                        |                            |          |
| Age (mean ± SD)                                                     | 56.8 ± 9.0          | 57.0 ± 8.8             | 56.3 ± 9.6                 | .22      |
| Sex (n, % female)                                                   | 5 (11.9)            | 4 (13.3)               | 1 (8.3)                    | .45      |
| Marital status ‖ (n, % married)                                     | 37 (88.1)           | 26 (86.7)              | 11 (91.7)                  | .45      |
| Educational attainment ‖ (n, % > high school)                       | 21 (50.0)           | 16 (53.3)              | 5 (41.7)                   | .29      |
| Work status ‖ (n, % employed)                                       | 35 (83.3)           | 26 (86.7)              | 9 (75.0)                   | .92      |
| Individual income ‖ (n, % > 33,697 CZK/month)                       | 19 (45.2)           | 13 (43.3)              | 6 (50.0)                   | .39      |
| Rurality ‖ (n, % > 30 min commute time to CR one-way by usual mode) | 11 (26.2)           | 5 (16.7)               | 6 (50.0)                   | 2.37 *   |
| <b>Clinical</b>                                                     |                     |                        |                            |          |
| Referral indication of CAD ° (n, % yes)                             | 20 (47.6)           | 17 (56.7)              | 3 (25.0)                   | 1.93     |
| Post-acute myocardial infarction (n, % yes)                         | 29 (69.0)           | 21 (70.0)              | 8 (66.7)                   | .21      |
| Angina pectoris (n, % yes)                                          | 5 (11.9)            | 3 (10.0)               | 2 (16.7)                   | .60      |
| Current/previous PCI (n, % yes)                                     | 32 (76.2)           | 22 (73.3)              | 9 (75.0)                   | .11      |
| Current/previous CABG (n, % yes)                                    | 2 (4.8)             | 2 (6.7)                | 0                          | .91      |
| Current/previous HF (n, % yes)                                      | 2 (4.8)             | 2 (6.7)                | 0                          | .91      |
| Current/previous arrhythmia (n, % yes)                              | 2 (4.8)             | 2 (6.7)                | 0                          | .91      |
| Current/previous valve issue (n, % yes)                             | 3 (7.1)             | 1 (3.3)                | 2 (16.7)                   | 1.57     |
| <b>Risk factors</b>                                                 |                     |                        |                            |          |
| BMI (mean ± SD)                                                     | 28.9 ± 4.2          | 29.1 ± 4.6             | 28.3 ± 2.7                 | .56      |
| Waist circumference (mean ± SD)                                     | 104 ± 12.2          | 105 ± 12.0             | 100 ± 12.0                 | 1.21     |
| Family history of CAD ‖ (n, % yes)                                  | 26 (61.9)           | 20 (66.7)              | 6 (50.0)                   | 1.01     |
| Hypertension ‖ (n, % yes)                                           | 26 (61.9)           | 18 (60)                | 8 (66.7)                   | .40      |
| Dyslipidemia ‖ (n, % yes)                                           | 31 (73.8)           | 23 (76.7)              | 8 (66.7)                   | .67      |
| Diabetes ‖ (n, % yes)                                               | 8 (19.0)            | 6 (20.0)               | 2 (16.7)                   | .24      |
| <b>Heart-healthy behaviors</b>                                      |                     |                        |                            |          |
| Physical activity ‖ (n, % inactive §)                               | 17 (40.5)           | 13 (43.3)              | 4 (33.3)                   | .59      |
| Tobacco use ‖ (n, % current)                                        | 8 (19.0)            | 5 (16.7)               | 3 (25.0)                   | .62      |
| Use of alcohol ‖ (n, % harmful ‡)                                   | 9 (21.4)            | 4 (13.3)               | 5 (41.7)                   | 2.13 *   |
| <b>Psychosocial well-being</b>                                      |                     |                        |                            |          |
| Stress ‖ (VAS, 1-10; mean ± SD)                                     | 5.2 ± 2.5           | 5.5 ± 2.4              | 4.4 ± 2.7                  | 1.29     |
| Depression and/or anxiety (n, % yes, diag./self-report ‖)           | 5 (11.9) / 5 (11.9) | 4 (13.3) / 4 (13.3)    | 1 (8.3) / 1 (8.3)          | .45      |
| <b>CR utilization</b>                                               |                     |                        |                            |          |
| Adherence (mean % of sessions completed ± SD)                       | 75.8 ± 24.9%        | 89.1 ± 7.4%            | 41.9 ± 21.5%               | 10.69 ** |

SD = standard deviation, CRBS = Cardiac Rehabilitation Barriers Scale, CR = cardiac rehabilitation, CAD = coronary artery disease, PCI = percutaneous coronary intervention, CABG = coronary artery bypass graft, HF = heart failure, BMI = body mass index, VAS = visual analogue scale; ‖ Presents self-report data. All other data measured or extracted from patient charts; \*  $p < 0.05$ ; \*\*  $p < 0.001$ . ° Defined as coronary artery stenosis > 50%, primomanifestation. § Defined as > 150/75 mins of moderate/vigorous intensity physical activity a week; ‡ Defined as > 2 standard drinks a day, or > 4 standard drinks on one occasion a week.
